# Supplementary material for: A convective heated digestion system with closed vessels: a new digestor for elemental inorganic analysis
Source: Royal Society of Chemistry journal article supplement (doi:10.1039/d3ja00328k), 2023-12-20
Supplement: d3ja00328k1.pdf [file d3ja00328k1.pdf]

**Sample ID list:** Samples #3, #6, #9 and #16 are from maize grains (*Zea mays*) grains. Samples #1 soy (*Glycine max*), #2 acerola (*Malpighia emarginata*), #4 persimmon (*Diospyros kaki*), #5 sorghum (*Sorghum bicolor*), #7 macadamia (*Macadamia sp.*), #8 teak (*Tectona grandis*), #10 grass (*Poaceae sp.*), #11 palm tree (*Arecaceae sp.*), #12 eucalyptus (*Eucalyptus sp.*), #13 pau rei (*Pterygota brasiliensis*), #14 caja mirin (*Spondias mombin*) and #15 figueira (*Ficus sp.*) leaves.

**Supplementary information 1.** Results for macronutrients (g kg<sup>-1</sup>) in plant materials determined (n=3) by ICP OES after sample digestion by CHDS, MWAD and NP procedures.

| Sample | Method | Macronutrients concentration (g kg <sup>-1</sup> ) |             |             |             |             | Sample | Macronutrients concentration (g kg <sup>-1</sup> ) |             |             |             |              |
|--------|--------|----------------------------------------------------|-------------|-------------|-------------|-------------|--------|----------------------------------------------------|-------------|-------------|-------------|--------------|
|        |        | P                                                  | K           | Ca          | Mg          | S           |        | P                                                  | K           | Ca          | Mg          | S            |
| 1      | NP     | 2.53 ± 0.04                                        | 25.2 ± 0.4  | 8.2 ± 0.1   | 2.30 ± 0.02 | 2.62 ± 0.03 | 9      | 2.2 ± 0.2                                          | 3.3 ± 0.4   | 0.49 ± 0.03 | 0.8 ± 0.1   | 0.84 ± 0.03  |
|        | MWAD   | 2.60 ± 0.07                                        | 27.2 ± 0.7  | 9.2 ± 0.5   | 2.49 ± 0.08 | 2.72 ± 0.05 |        | 2.2 ± 0.2                                          | 3.4 ± 0.2   | 0.54 ± 0.02 | 0.8 ± 0.1   | 0.83 ± 0.06  |
|        | CHDS   | 2.59 ± 0.03                                        | 25.6 ± 0.4  | 8.6 ± 0.3   | 2.38 ± 0.02 | 2.66 ± 0.07 |        | 2.3 ± 0.1                                          | 3.4 ± 0.1   | 0.57 ± 0.06 | 0.84 ± 0.04 | 0.86 ± 0.06  |
| 2      | NP     | 2.12 ± 0.03                                        | 20 ± 1      | 46 ± 2      | 10.9 ± 0.5  | 3.78 ± 0.08 | 10     | 2.47 ± 0.05                                        | 31.6 ± 0.8  | 4.9 ± 0.2   | 1.69 ± 0.05 | 2.01 ± 0.04  |
|        | MWAD   | 2.09 ± 0.08                                        | 19.0 ± 0.6  | 42 ± 2      | 10.40 ± 0.5 | 3.6 ± 0.1   |        | 2.5 ± 0.2                                          | 32 ± 2      | 5.0 ± 0.5   | 1.7 ± 0.2   | 2.1 ± 0.1    |
|        | CHDS   | 1.93 ± 0.07                                        | 17.4 ± 0.7  | 39 ± 2      | 9.4 ± 0.3   | 3.4 ± 0.1   |        | 2.5 ± 0.1                                          | 32 ± 2      | 5.0 ± 0.3   | 1.9 ± 0.2   | 1.98 ± 0.07  |
| 3      | NP     | 2.21 ± 0.01                                        | 3.38 ± 0.03 | 0.19 ± 0.04 | 0.78 ± 0.02 | 0.84 ± 0.02 | 11     | 0.54 ± 0.02                                        | 7.04 ± 0.08 | 4.3 ± 0.3   | 1.53 ± 0.01 | 1.8 ± 0.2    |
|        | MWAD   | 2.21 ± 0.05                                        | 3.61 ± 0.01 | 0.17 ± 0.01 | 0.82 ± 0.03 | 0.86 ± 0.07 |        | 0.54 ± 0.01                                        | 6.9 ± 0.2   | 4.4 ± 0.2   | 1.46 ± 0.01 | 1.86 ± 0.02  |
|        | CHDS   | 2.08 ± 0.08                                        | 3.3 ± 0.2   | 0.14 ± 0.03 | 0.73 ± 0.05 | 0.83 ± 0.04 |        | 0.58 ± 0.03                                        | 7.2 ± 0.3   | 4.8 ± 0.2   | 1.7 ± 0.1   | 2.04 ± 0.06  |
| 4      | NP     | 1.22 ± 0.01                                        | 34.0 ± 0.5  | 12.1 ± 0.1  | 3.4 ± 0.1   | 2.54 ± 0.05 | 12     | 0.95 ± 0.02                                        | 7.3 ± 0.3   | 9.0 ± 0.4   | 2.4 ± 0.1   | 1.13 ± 0.02  |
|        | MWAD   | 1.18 ± 0.04                                        | 34 ± 3      | 12.0 ± 0.9  | 3.4 ± 0.2   | 2.5 ± 0.1   |        | 0.90 ± 0.02                                        | 6.7 ± 0.2   | 8.7 ± 0.05  | 2.3 ± 0.1   | 1.05 ± 0.01  |
|        | CHDS   | 1.19 ± 0.06                                        | 33 ± 2      | 11.8 ± 0.6  | 3.3 ± 0.1   | 2.5 ± 0.1   |        | 0.95 ± 0.07                                        | 7.2 ± 0.5   | 9.2 ± 0.8   | 2.5 ± 0.2   | 1.09 ± 0.07  |
| 5      | NP     | 4.6 ± 0.1                                          | 28 ± 2      | 4.5 ± 0.2   | 3.6 ± 0.2   | 1.71 ± 0.04 | 13     | 2.98 ± 0.07                                        | 16.9 ± 0.3  | 28.3 ± 0.8  | 8.3 ± 0.3   | 1.84 ± 0.04  |
|        | MWAD   | 4.24 ± 0.03                                        | 26 ± 2      | 4.2 ± 0.1   | 3.4 ± 0.2   | 1.9 ± 0.4   |        | 3.0 ± 0.1                                          | 16.9 ± 0.4  | 29.0 ± 0.5  | 8.5 ± 0.1   | 1.82 ± 0.06  |
|        | CHDS   | 4.5 ± 0.3                                          | 28 ± 1      | 4.5 ± 0.3   | 3.7 ± 0.2   | 1.7 ± 0.1   |        | 3.0 ± 0.2                                          | 17 ± 1      | 28.0 ± 0.7  | 8.6 ± 0.5   | 1.8 ± 0.1    |
| 6      | NP     | 2.3 ± 0.1                                          | 3.6 ± 0.4   | 0.22 ± 0.08 | 0.8 ± 0.1   | 0.87 ± 0.05 | 14     | 1.53 ± 0.01                                        | 6.48 ± 0.03 | 23.3 ± 0.3  | 2.44 ± 0.02 | 2.69 ± 0.07  |
|        | MWAD   | 2.21 ± 0.03                                        | 3.6 ± 0.2   | 0.17 ± 0.02 | 0.82 ± 0.04 | 0.88 ± 0.06 |        | 1.54 ± 0.05                                        | 6.5 ± 0.2   | 23.7 ± 1.2  | 2.7 ± 0.1   | 2.65 ± 0.05  |
|        | CHDS   | 2.1 ± 0.1                                          | 3.3 ± 0.2   | 0.19 ± 0.08 | 0.74 ± 0.05 | 0.84 ± 0.04 |        | 1.57 ± 0.06                                        | 6.6 ± 0.3   | 24.7 ± 1.5  | 2.6 ± 0.2   | 2.73 ± 0.06  |
| 7      | NP     | 0.57 ± 0.1                                         | 6.2 ± 0.3   | 6.7 ± 0.3   | 1.0 ± 0.3   | 1.2 ± 0.2   | 15     | 1.62 ± 0.01                                        | 15.0 ± 0.1  | 16.3 ± 0.2  | 2.01 ± 0.01 | 1.37 ± 0.02  |
|        | MWAD   | 0.65 ± 0.03                                        | 6.4 ± 0.2   | 6.9 ± 0.2   | 1.29 ± 0.02 | 1.5 ± 0.1   |        | 1.57 ± 0.02                                        | 14.5 ± 0.4  | 15.8 ± 0.4  | 1.97 ± 0.04 | 1.33 ± 0.05  |
|        | CHDS   | 0.60 ± 0.04                                        | 5.9 ± 0.4   | 6.6 ± 0.5   | 1.2 ± 0.2   | 1.20 ± 0.08 |        | 1.58 ± 0.04                                        | 14.3 ± 0.5  | 15.9 ± 0.6  | 1.94 ± 0.06 | 1.33 ± 0.05  |
| 8      | NP     | 1.34 ± 0.03                                        | 14.4 ± 0.6  | 20 ± 1      | 3.4 ± 0.2   | 1.27 ± 0.04 | 16     | 2.08 ± 0.09                                        | 3.20 ± 0.08 | 0.42 ± 0.03 | 0.69 ± 0.04 | 0.76 ± 0.01* |
|        | MWAD   | 1.22 ± 0.06                                        | 13.1 ± 0.3  | 18.2 ± 0.3  | 3.08 ± 0.07 | 1.7 ± 0.4   |        | 1.91 ± 0.03                                        | 2.96 ± 0.06 | 0.55 ± 0.02 | 0.61 ± 0.01 | 0.69 ± 0.02  |
|        | CHDS   | 1.3 ± 0.2                                          | 13.7 ± 0.2  | 18.4 ± 0.8  | 3.3 ± 0.4   | 1.3 ± 0.2   |        | 2.00 ± 0.06                                        | 3.0 ± 0.1   | 0.54 ± 0.07 | 0.68 ± 0.05 | 0.72 ± 0.03  |

\*Non-concordant values at 95% confidence level (t-test)

**Supplementary information 2.** Results for micronutrients (mg kg<sup>-1</sup>) in plant materials determined (n=3) by ICP OES after sample digestion by CHDS, MWAD and NP procedures.

| Sample | Method | Micronutrients concentration (mg kg <sup>-1</sup> ) |             |          |             |              | Sample | Micronutrients concentration (mg kg <sup>-1</sup> ) |              |          |            |            |
|--------|--------|-----------------------------------------------------|-------------|----------|-------------|--------------|--------|-----------------------------------------------------|--------------|----------|------------|------------|
|        |        | B                                                   | Cu          | Fe       | Mn          | Zn           |        | B                                                   | Cu           | Fe       | Mn         | Zn         |
| 1      | NP     | -                                                   | 6.9 ± 0.1   | 157 ± 1  | 148 ± 1     | 32.6 ± 0.2   | 9      | -                                                   | 1.7 ± 0.1    | 146 ± 10 | 5.7 ± 0.8  | 14 ± 1     |
|        | MWAD   | 44 ± 4                                              | 6.1 ± 0.3   | 167 ± 5  | 157 ± 2     | 36 ± 2       |        | 21.8 ± 0.7                                          | 1.9 ± 0.2    | 156 ± 9  | 5.3 ± 0.2  | 14.3 ± 0.7 |
|        | CHDS   | 45.0 ± 0.9                                          | 6.4 ± 0.1   | 165 ± 12 | 156 ± 3     | 37 ± 2       |        | 20.6 ± 0.7                                          | 1.7 ± 0.1    | 140 ± 5  | 6.1 ± 0.8  | 15.3 ± 0.6 |
| 2      | NP     | -                                                   | 6.3 ± 0.1   | 199 ± 2  | 33.5 ± 0.2  | 17.1 ± 0.1   | 10     | -                                                   | 12.6 ± 0.3   | 328 ± 5  | 143 ± 1    | 36.0 ± 0.6 |
|        | MWAD   | 62 ± 1                                              | 5.6 ± 0.1   | 197 ± 2  | 33.9 ± 0.2  | 20.7 ± 0.1   |        | 11.3 ± 0.3                                          | 12.3 ± 0.1   | 322 ± 6  | 138 ± 4    | 34.4 ± 0.3 |
|        | CHDS   | 62 ± 1                                              | 5.7 ± 0.1   | 191 ± 15 | 36 ± 2      | 21 ± 1       |        | 11.6 ± 0.1                                          | 12.2 ± 0.2   | 322 ± 5  | 143 ± 2    | 35.3 ± 0.4 |
| 3      | NP     | -                                                   | 2.1 ± 0.1   | 164 ± 26 | 5.0 ± 0.6   | 14.6 ± 0.8   | 11     | -                                                   | 2.66 ± 0.2   | 252 ± 20 | 150 ± 5    | 10.1 ± 0.7 |
|        | MWAD   | 19 ± 2                                              | 1.83 ± 0.05 | 157 ± 29 | 4.2 ± 0.2   | 16 ± 1       |        | 14 ± 1                                              | 2.5 ± 0.1    | 272 ± 4  | 150 ± 1    | 9.7 ± 0.9  |
|        | CHDS   | 16.4 ± 0.5                                          | 2.3 ± 0.5   | 151 ± 6  | 4.9 ± 0.6   | 15.6 ± 0.6   |        | 16.5 ± 0.4                                          | 2.62 ± 0.05  | 272 ± 16 | 154 ± 3    | 11.0 ± 0.3 |
| 4      | NP     | -                                                   | 4.1 ± 0.1   | 156 ± 7  | 1408 ± 12   | 14.8 ± 0.2   | 12     | -                                                   | 6.3 ± 0.3    | 283 ± 10 | 768 ± 16   | 14.6 ± 0.7 |
|        | MWAD   | 53.0 ± 0.9                                          | 3.79 ± 0.06 | 158 ± 4  | 1475 ± 9    | 18.24 ± 0.02 |        | 49.8 ± 0.2                                          | 5.7 ± 0.1    | 293 ± 7  | 754 ± 16   | 14.8 ± 0.9 |
|        | CHDS   | 52 ± 1                                              | 4.1 ± 0.1   | 156 ± 8  | 1474 ± 28   | 19 ± 1       |        | 50.6 ± 0.6                                          | 5.9 ± 0.2    | 306 ± 7  | 739 ± 7    | 15.7 ± 0.2 |
| 5      | NP     | -                                                   | 8.7 ± 0.1   | 205 ± 2  | 16.9 ± 0.07 | 21.6 ± 0.5   | 13     | -                                                   | 14.6 ± 0.2   | 212 ± 4  | 353 ± 7    | 23.9 ± 0.8 |
|        | MWAD   | 6.0 ± 0.2                                           | 8.2 ± 0.2   | 197 ± 9  | 17.5 ± 0.9  | 25.1 ± 0.6   |        | 65 ± 2                                              | 14.3 ± 0.1   | 217 ± 1  | 345 ± 3    | 24 ± 1     |
|        | CHDS   | 5.8 ± 0.1                                           | 8.4 ± 0.1   | 203 ± 2  | 16.9 ± 0.1  | 24.2 ± 0.3   |        | 68 ± 1                                              | 14.8 ± 0.1   | 215 ± 5  | 348 ± 2    | 24.4 ± 0.4 |
| 6      | NP     | -                                                   | 1.9 ± 0.1   | 168 ± 19 | 5.1 ± 0.3   | 14.7 ± 0.4   | 14     | -                                                   | 10.5 ± 0.6   | 424 ± 7  | 76 ± 1     | 15.6 ± 0.3 |
|        | MWAD   | 18 ± 2                                              | 1.91 ± 0.01 | 132 ± 4  | 4.2 ± 0.1   | 16.4 ± 0.2   |        | 46 ± 1                                              | 9.7 ± 0.2    | 400 ± 4* | 76 ± 3     | 15.5 ± 0.7 |
|        | CHDS   | 15.9 ± 0.5                                          | 2.00 ± 0.04 | 163 ± 26 | 5.8 ± 0.5   | 16.3 ± 0.3   |        | 44 ± 1                                              | 10.2 ± 0.3   | 442 ± 26 | 76 ± 2     | 16.1 ± 0.1 |
| 7      | NP     | -                                                   | 4.2 ± 0.1   | 152 ± 9  | 937 ± 7     | 7.2 ± 0.3    | 15     | -                                                   | 5.6 ± 0.3    | 200 ± 2* | 23.1 ± 0.3 | 12.5 ± 0.3 |
|        | MWAD   | 39.4 ± 0.3                                          | 3.87 ± 0.03 | 156 ± 7  | 993 ± 26    | 10.4 ± 0.4   |        | 76 ± 1                                              | 5.3 ± 0.1    | 196 ± 6  | 23.5 ± 0.5 | 12.7 ± 0.4 |
|        | CHDS   | 37 ± 1                                              | 4.10 ± 0.09 | 167 ± 11 | 1024 ± 16   | 9.78 ± 0.06  |        | 76 ± 3                                              | 5.4 ± 0.2    | 205 ± 1  | 24.5 ± 0.4 | 13.7 ± 0.3 |
| 8      | NP     | -                                                   | 11.0 ± 0.2  | 572 ± 5  | 52 ± 1      | 22.6 ± 0.4   | 16     | -                                                   | 1.76 ± 0.05* | 150 ± 2  | 6.0 ± 0.4  | 13.7 ± 0.2 |
|        | MWAD   | 36 ± 1                                              | 10.0 ± 0.2  | 558 ± 13 | 55 ± 1      | 26.4 ± 0.2   |        | 21 ± 1                                              | 1.5 ± 0.1    | 158 ± 4  | 6.3 ± 0.9  | 13.5 ± 0.3 |
|        | CHDS   | 38 ± 4                                              | 11 ± 1      | 571 ± 61 | 58 ± 7      | 27 ± 3       |        | 21.6 ± 0.7                                          | 1.6 ± 0.1    | 151 ± 5  | 6.6 ± 0.5  | 13.3 ± 0.9 |

\*Non-concordant values at 95% confidence level (t-test)
